# Supplementary material for: Development of Novel Peptides for the Antimicrobial Combination Therapy against Carbapenem-Resistant Acinetobacter baumannii Infection
Source: MDPI journal article supplement (doi:10.3390/pharmaceutics13111800), 2021-10-27
Supplement: s1 [file s1]

# Supplementary Materials: Development of Novel Peptides for the Antimicrobial Combination Therapy Against Carbapenem-resistant *Acinetobacter Baumannii* Infection

Joonhyeok Choi, Ahjin Jang, Young Kyung Yoon and Yangmee Kim

|         |  |
|---------|--|
| 100~99% |  |
| 99~90%  |  |
| 89~50%  |  |
| 49~20%  |  |
| 19~0%   |  |

| FICI                                            |    | CRAB C1                                       |      |      |      |      |      |      |
|-------------------------------------------------|----|-----------------------------------------------|------|------|------|------|------|------|
|                                                 |    | Imipenem ( $\mu\text{g}\cdot\text{mL}^{-1}$ ) |      |      |      |      |      |      |
|                                                 |    | 64                                            | 32   | 16   | 8    | 4    | 2    | 0    |
| PapMA-3<br>( $\mu\text{g}\cdot\text{mL}^{-1}$ ) | 16 | 2.00                                          | 1.50 | 1.25 | 1.13 | 1.06 | 1.03 | 1.00 |
|                                                 | 8  | 1.50                                          | 1.00 | 0.75 | 0.63 | 0.56 | 0.53 |      |
|                                                 | 4  | 1.25                                          | 0.75 | 0.50 | 0.38 | 0.31 | 0.28 |      |
|                                                 | 2  | 1.13                                          | 0.63 | 0.38 | 0.25 | 0.19 |      |      |
|                                                 | 1  | 1.06                                          | 0.56 | 0.31 | 0.19 |      |      |      |
|                                                 | 0  | 1.00                                          |      |      |      |      |      |      |

| FICI                                            |    | CRAB C1                                           |      |      |      |      |      |      |
|-------------------------------------------------|----|---------------------------------------------------|------|------|------|------|------|------|
|                                                 |    | Erythromycin ( $\mu\text{g}\cdot\text{mL}^{-1}$ ) |      |      |      |      |      |      |
|                                                 |    | 512                                               | 256  | 128  | 64   | 32   | 16   | 0    |
| PapMA-3<br>( $\mu\text{g}\cdot\text{mL}^{-1}$ ) | 16 | 1.50                                              | 1.25 | 1.13 | 1.06 | 1.03 | 1.02 | 1.00 |
|                                                 | 8  | 1.00                                              | 0.75 | 0.63 | 0.56 | 0.53 | 0.52 |      |
|                                                 | 4  | 0.75                                              | 0.50 | 0.38 | 0.31 | 0.28 | 0.27 |      |
|                                                 | 2  | 0.63                                              | 0.38 | 0.25 | 0.19 |      |      |      |
|                                                 | 1  | 0.56                                              | 0.31 | 0.19 | 0.13 |      |      |      |
|                                                 | 0  |                                                   |      |      |      |      |      |      |

| FICI                                            |    | CRAB C1                                        |      |      |      |      |      |      |
|-------------------------------------------------|----|------------------------------------------------|------|------|------|------|------|------|
|                                                 |    | Meropenem ( $\mu\text{g}\cdot\text{mL}^{-1}$ ) |      |      |      |      |      |      |
|                                                 |    | 64                                             | 32   | 16   | 8    | 4    | 2    | 0    |
| PapMA-3<br>( $\mu\text{g}\cdot\text{mL}^{-1}$ ) | 16 | 1.50                                           | 1.25 | 1.13 | 1.06 | 1.03 | 1.02 | 1.00 |
|                                                 | 8  | 1.00                                           | 0.75 | 0.63 | 0.56 | 0.53 | 0.52 |      |
|                                                 | 4  | 0.75                                           | 0.50 | 0.38 |      |      |      |      |
|                                                 | 2  | 0.63                                           | 0.38 |      |      |      |      |      |
|                                                 | 1  | 0.56                                           |      |      |      |      |      |      |
|                                                 | 0  |                                                |      |      |      |      |      |      |

| FICI                                            |    | CRAB C1                                         |      |      |      |      |      |      |
|-------------------------------------------------|----|-------------------------------------------------|------|------|------|------|------|------|
|                                                 |    | Vancomycin ( $\mu\text{g}\cdot\text{mL}^{-1}$ ) |      |      |      |      |      |      |
|                                                 |    | 256                                             | 128  | 64   | 32   | 16   | 8    | 0    |
| PapMA-3<br>( $\mu\text{g}\cdot\text{mL}^{-1}$ ) | 16 | 2.00                                            | 1.50 | 1.25 | 1.13 | 1.06 | 1.02 | 1.00 |
|                                                 | 8  | 1.50                                            | 1.00 | 0.75 | 0.63 | 0.56 | 0.53 |      |
|                                                 | 4  | 1.25                                            | 0.75 | 0.50 | 0.38 | 0.31 |      |      |
|                                                 | 2  | 1.13                                            | 0.63 | 0.38 | 0.25 | 0.19 |      |      |
|                                                 | 1  | 1.06                                            | 0.56 | 0.31 | 0.19 | 0.13 |      |      |
|                                                 | 0  | 1.00                                            |      |      |      |      |      |      |

| FICI                                            |    | CRAB C1                                       |      |      |      |      |      |      |
|-------------------------------------------------|----|-----------------------------------------------|------|------|------|------|------|------|
|                                                 |    | Rifampin ( $\mu\text{g}\cdot\text{mL}^{-1}$ ) |      |      |      |      |      |      |
|                                                 |    | 128                                           | 64   | 32   | 16   | 8    | 4    | 0    |
| PapMA-3<br>( $\mu\text{g}\cdot\text{mL}^{-1}$ ) | 16 | 2.00                                          | 1.50 | 1.25 | 1.13 | 1.06 | 1.03 | 1.00 |
|                                                 | 8  | 1.50                                          | 1.00 | 0.75 | 0.63 | 0.56 | 0.53 |      |
|                                                 | 4  | 1.25                                          | 0.75 | 0.50 | 0.38 | 0.31 |      |      |
|                                                 | 2  | 1.13                                          | 0.63 | 0.38 | 0.25 |      |      |      |
|                                                 | 1  | 1.06                                          | 0.56 | 0.31 | 0.19 |      |      |      |
|                                                 | 0  | 1.00                                          |      |      |      |      |      |      |

| FICI                                            |    | CRAB C1                                        |      |      |      |      |      |      |
|-------------------------------------------------|----|------------------------------------------------|------|------|------|------|------|------|
|                                                 |    | Linezolid ( $\mu\text{g}\cdot\text{mL}^{-1}$ ) |      |      |      |      |      |      |
|                                                 |    | 256                                            | 128  | 64   | 32   | 16   | 8    | 0    |
| PapMA-3<br>( $\mu\text{g}\cdot\text{mL}^{-1}$ ) | 16 | 2.00                                           | 1.50 | 1.25 | 1.13 | 1.06 | 1.03 | 1.00 |
|                                                 | 8  | 1.50                                           | 1.00 | 0.75 | 0.63 | 0.56 | 0.53 |      |
|                                                 | 4  | 1.25                                           | 0.75 | 0.50 | 0.38 | 0.31 |      |      |
|                                                 | 2  | 1.13                                           | 0.63 | 0.38 | 0.25 |      |      |      |
|                                                 | 1  | 1.06                                           | 0.56 | 0.31 | 0.19 |      |      |      |
|                                                 | 0  | 1.00                                           |      |      |      |      |      |      |

**Supplementary Figure S1.** PapMA-3 and antibiotic checkboard assay results, showing fractional inhibitory concentration index (FICI) calculated against CRAB C1 according to Equation 1. White ( $0.5 < \text{FICI} < 2$ ) indicates a partial synergistic effect, yellow ( $\text{FICI} = 0.5$ ) and orange ( $0.25 \leq \text{FICI} < 0.5$ ) indicate a synergistic effect. We defined MIC as the minimum concentration that killed more than 99% of bacteria. In contrast, the box marked in black indicates that inhibition of CRAB C1 growth was less than 99%.

| FICI                                            |    | CRAB C2                                       |      |      |      |      |      |      |
|-------------------------------------------------|----|-----------------------------------------------|------|------|------|------|------|------|
|                                                 |    | Imipenem ( $\mu\text{g}\cdot\text{mL}^{-1}$ ) |      |      |      |      |      |      |
|                                                 |    | 64                                            | 32   | 16   | 8    | 4    | 2    | 0    |
| PapMA-3<br>( $\mu\text{g}\cdot\text{mL}^{-1}$ ) | 16 | 2.00                                          | 1.50 | 1.25 | 1.13 | 1.06 | 1.03 | 1.00 |
|                                                 | 8  | 1.50                                          | 1.00 | 0.75 | 0.63 | 0.56 | 0.53 |      |
|                                                 | 4  | 1.25                                          | 0.75 | 0.50 | 0.38 |      |      |      |
|                                                 | 2  | 1.13                                          | 0.63 | 0.38 | 0.25 |      |      |      |
|                                                 | 1  | 1.06                                          | 0.56 | 0.31 | 0.19 |      |      |      |
|                                                 | 0  | 1.00                                          |      |      |      |      |      |      |

| FICI                                            |    | CRAB C2                                           |      |      |      |      |      |      |
|-------------------------------------------------|----|---------------------------------------------------|------|------|------|------|------|------|
|                                                 |    | Erythromycin ( $\mu\text{g}\cdot\text{mL}^{-1}$ ) |      |      |      |      |      |      |
|                                                 |    | 512                                               | 256  | 128  | 64   | 32   | 16   | 0    |
| PapMA-3<br>( $\mu\text{g}\cdot\text{mL}^{-1}$ ) | 16 | 2.00                                              | 1.50 | 1.25 | 1.13 | 1.06 | 1.03 | 1.00 |
|                                                 | 8  | 1.50                                              | 1.00 | 0.75 | 0.63 | 0.56 | 0.53 |      |
|                                                 | 4  | 1.25                                              | 0.75 | 0.50 | 0.38 | 0.31 |      |      |
|                                                 | 2  | 1.13                                              | 0.63 | 0.38 | 0.25 |      |      |      |
|                                                 | 1  | 1.06                                              | 0.56 | 0.31 | 0.19 |      |      |      |
|                                                 | 0  | 1.00                                              |      |      |      |      |      |      |

| FICI                                            |    | CRAB C2                                        |      |      |      |      |      |      |
|-------------------------------------------------|----|------------------------------------------------|------|------|------|------|------|------|
|                                                 |    | Meropenem ( $\mu\text{g}\cdot\text{mL}^{-1}$ ) |      |      |      |      |      |      |
|                                                 |    | 64                                             | 32   | 16   | 8    | 4    | 2    | 0    |
| PapMA-3<br>( $\mu\text{g}\cdot\text{mL}^{-1}$ ) | 16 | 2.00                                           | 1.50 | 1.25 | 1.06 | 1.03 | 1.02 | 1.00 |
|                                                 | 8  | 1.50                                           | 1.00 | 0.75 | 0.63 | 0.56 | 0.53 |      |
|                                                 | 4  | 1.25                                           | 0.75 |      |      |      |      |      |
|                                                 | 2  | 1.13                                           | 0.63 |      |      |      |      |      |
|                                                 | 1  | 1.06                                           |      |      |      |      |      |      |
|                                                 | 0  | 1.00                                           |      |      |      |      |      |      |

| FICI                                            |    | CRAB C2                                         |      |      |      |      |      |      |
|-------------------------------------------------|----|-------------------------------------------------|------|------|------|------|------|------|
|                                                 |    | Vancomycin ( $\mu\text{g}\cdot\text{mL}^{-1}$ ) |      |      |      |      |      |      |
|                                                 |    | 256                                             | 128  | 64   | 32   | 16   | 8    | 0    |
| PapMA-3<br>( $\mu\text{g}\cdot\text{mL}^{-1}$ ) | 16 | 2.00                                            | 1.50 | 1.25 | 1.13 | 1.06 | 1.03 | 1.00 |
|                                                 | 8  | 1.50                                            | 1.00 | 0.75 | 0.63 | 0.56 | 0.53 |      |
|                                                 | 4  | 1.25                                            | 0.75 | 0.50 | 0.38 | 0.31 |      |      |
|                                                 | 2  | 1.13                                            | 0.63 | 0.38 | 0.25 | 0.19 | 0.16 |      |
|                                                 | 1  | 1.06                                            | 0.56 | 0.31 | 0.19 | 0.13 |      |      |
|                                                 | 0  | 1.00                                            |      |      |      |      |      |      |

| FICI                                            |    | CRAB C2                                       |      |      |      |      |      |      |
|-------------------------------------------------|----|-----------------------------------------------|------|------|------|------|------|------|
|                                                 |    | Rifampin ( $\mu\text{g}\cdot\text{mL}^{-1}$ ) |      |      |      |      |      |      |
|                                                 |    | 64                                            | 32   | 16   | 8    | 4    | 2    | 0    |
| PapMA-3<br>( $\mu\text{g}\cdot\text{mL}^{-1}$ ) | 16 | 2.00                                          | 1.50 | 1.25 | 1.13 | 1.06 | 1.03 | 1.00 |
|                                                 | 8  | 1.50                                          | 1.00 | 0.75 | 0.63 | 0.56 | 0.53 |      |
|                                                 | 4  | 1.25                                          | 0.75 | 0.50 | 0.38 | 0.31 | 0.28 |      |
|                                                 | 2  | 1.13                                          | 0.63 | 0.38 | 0.25 | 0.19 | 0.16 |      |
|                                                 | 1  | 1.06                                          | 0.56 | 0.31 | 0.19 | 0.13 | 0.10 |      |
|                                                 | 0  | 1.00                                          |      |      |      |      |      |      |

| FICI                                            |    | CRAB C2                                        |      |      |      |      |      |      |
|-------------------------------------------------|----|------------------------------------------------|------|------|------|------|------|------|
|                                                 |    | Linezolid ( $\mu\text{g}\cdot\text{mL}^{-1}$ ) |      |      |      |      |      |      |
|                                                 |    | 256                                            | 128  | 64   | 32   | 16   | 8    | 0    |
| PapMA-3<br>( $\mu\text{g}\cdot\text{mL}^{-1}$ ) | 16 | 2.00                                           | 1.50 | 1.25 | 1.13 | 1.06 | 1.03 | 1.00 |
|                                                 | 8  | 1.50                                           | 1.00 | 0.75 | 0.63 | 0.56 |      |      |
|                                                 | 4  | 1.25                                           | 0.75 | 0.50 | 0.38 |      |      |      |
|                                                 | 2  | 1.13                                           | 0.63 | 0.38 | 0.25 |      |      |      |
|                                                 | 1  | 1.06                                           | 0.56 | 0.31 | 0.19 |      |      |      |
|                                                 | 0  | 1.00                                           |      |      |      |      |      |      |

**Supplementary Figure S2.** PapMA-3 and antibiotic checkboard assay results, showing FICI calculated against CRAB C2.

| FICI                                            |    | CRAB C3                                       |      |      |      |      |      |      |
|-------------------------------------------------|----|-----------------------------------------------|------|------|------|------|------|------|
|                                                 |    | Imipenem ( $\mu\text{g}\cdot\text{mL}^{-1}$ ) |      |      |      |      |      |      |
|                                                 |    | 64                                            | 32   | 16   | 8    | 4    | 1    | 0    |
| PapMA-3<br>( $\mu\text{g}\cdot\text{mL}^{-1}$ ) | 16 | 2.00                                          | 1.50 | 1.25 | 1.13 | 1.06 | 1.02 | 1.00 |
|                                                 | 8  | 1.50                                          | 1.00 | 0.75 | 0.63 | 0.56 | 0.52 |      |
|                                                 | 4  | 1.25                                          | 0.75 | 0.50 | 0.38 | 0.31 | 0.27 |      |
|                                                 | 2  | 1.13                                          | 0.63 | 0.38 |      | 0.19 |      |      |
|                                                 | 1  | 1.06                                          | 0.56 | 0.31 |      |      |      |      |
|                                                 | 0  | 1.00                                          |      |      |      |      |      |      |

| FICI                                            |    | CRAB C3                                           |      |      |      |      |      |      |
|-------------------------------------------------|----|---------------------------------------------------|------|------|------|------|------|------|
|                                                 |    | Erythromycin ( $\mu\text{g}\cdot\text{mL}^{-1}$ ) |      |      |      |      |      |      |
|                                                 |    | 512                                               | 256  | 128  | 64   | 32   | 16   | 0    |
| PapMA-3<br>( $\mu\text{g}\cdot\text{mL}^{-1}$ ) | 16 | 2.00                                              | 1.50 | 1.25 | 1.13 | 1.06 | 1.03 | 1.00 |
|                                                 | 8  | 1.50                                              | 1.00 | 0.75 | 0.63 | 0.56 | 0.53 |      |
|                                                 | 4  | 1.25                                              | 0.75 | 0.50 | 0.38 | 0.31 |      |      |
|                                                 | 2  | 1.13                                              | 0.63 | 0.38 | 0.25 |      |      |      |
|                                                 | 1  | 1.06                                              | 0.56 | 0.31 |      |      |      |      |
|                                                 | 0  | 1.00                                              |      |      |      |      |      |      |

| FICI                                            |    | CRAB C3                                        |      |      |      |      |      |      |
|-------------------------------------------------|----|------------------------------------------------|------|------|------|------|------|------|
|                                                 |    | Meropenem ( $\mu\text{g}\cdot\text{mL}^{-1}$ ) |      |      |      |      |      |      |
|                                                 |    | 64                                             | 32   | 16   | 8    | 4    | 2    | 0    |
| PapMA-3<br>( $\mu\text{g}\cdot\text{mL}^{-1}$ ) | 16 | 2.00                                           | 1.50 | 1.25 | 1.06 | 1.03 | 1.02 | 1.00 |
|                                                 | 8  | 1.50                                           | 1.00 | 0.75 | 0.63 | 0.53 | 0.52 |      |
|                                                 | 4  | 1.25                                           | 0.75 | 0.50 |      |      |      |      |
|                                                 | 2  | 1.13                                           | 0.63 | 0.38 |      |      |      |      |
|                                                 | 1  | 1.06                                           | 0.56 |      |      |      |      |      |
|                                                 | 0  | 1.00                                           |      |      |      |      |      |      |

| FICI                                            |    | CRAB C3                                         |      |      |      |      |      |      |
|-------------------------------------------------|----|-------------------------------------------------|------|------|------|------|------|------|
|                                                 |    | Vancomycin ( $\mu\text{g}\cdot\text{mL}^{-1}$ ) |      |      |      |      |      |      |
|                                                 |    | 256                                             | 128  | 64   | 32   | 8    | 4    | 0    |
| PapMA-3<br>( $\mu\text{g}\cdot\text{mL}^{-1}$ ) | 16 | 2.00                                            | 1.50 | 1.25 | 1.13 | 1.03 | 1.02 | 1.00 |
|                                                 | 8  | 1.50                                            | 1.00 | 0.75 | 0.63 | 0.53 | 0.52 |      |
|                                                 | 4  | 1.25                                            | 0.75 | 0.50 | 0.38 |      |      |      |
|                                                 | 2  | 1.13                                            | 0.63 | 0.38 |      |      |      |      |
|                                                 | 1  | 1.06                                            | 0.56 | 0.31 |      |      |      |      |
|                                                 | 0  | 1.00                                            |      |      |      |      |      |      |

| FICI                                            |    | CRAB C3                                       |      |      |      |      |      |      |
|-------------------------------------------------|----|-----------------------------------------------|------|------|------|------|------|------|
|                                                 |    | Rifampin ( $\mu\text{g}\cdot\text{mL}^{-1}$ ) |      |      |      |      |      |      |
|                                                 |    | 128                                           | 64   | 32   | 16   | 8    | 4    | 0    |
| PapMA-3<br>( $\mu\text{g}\cdot\text{mL}^{-1}$ ) | 16 | 2.00                                          | 1.50 | 1.25 | 1.13 | 1.06 | 1.03 | 1.00 |
|                                                 | 8  | 1.50                                          | 1.00 | 0.75 | 0.63 | 0.56 | 0.53 |      |
|                                                 | 4  | 1.25                                          | 0.75 | 0.50 | 0.38 | 0.31 | 0.28 |      |
|                                                 | 2  | 1.13                                          | 0.63 | 0.38 | 0.25 | 0.19 | 0.16 |      |
|                                                 | 1  | 1.06                                          | 0.56 | 0.31 | 0.19 | 0.13 | 0.10 |      |
|                                                 | 0  | 1.00                                          |      |      |      |      |      |      |

| FICI                                            |    | CRAB C3                                        |      |      |      |      |      |      |
|-------------------------------------------------|----|------------------------------------------------|------|------|------|------|------|------|
|                                                 |    | Linezolid ( $\mu\text{g}\cdot\text{mL}^{-1}$ ) |      |      |      |      |      |      |
|                                                 |    | 256                                            | 128  | 64   | 32   | 16   | 8    | 0    |
| PapMA-3<br>( $\mu\text{g}\cdot\text{mL}^{-1}$ ) | 16 | 2.00                                           | 1.50 | 1.25 | 1.13 | 1.06 | 1.03 | 1.00 |
|                                                 | 8  | 1.50                                           | 1.00 | 0.75 | 0.63 | 0.56 | 0.53 |      |
|                                                 | 4  | 1.25                                           | 0.75 | 0.50 |      |      |      |      |
|                                                 | 2  | 1.13                                           | 0.50 |      |      |      |      |      |
|                                                 | 1  | 1.06                                           | 0.38 | 0.19 |      |      |      |      |
|                                                 | 0  | 1.00                                           |      |      |      |      |      |      |

**Supplementary Figure S3.** PapMA-3 and antibiotic checkboard assay results, showing FICI calculated against CRAB C3.

| FICI                                            |    | CRAB C4                                       |      |      |      |      |      |      |
|-------------------------------------------------|----|-----------------------------------------------|------|------|------|------|------|------|
|                                                 |    | Imipenem ( $\mu\text{g}\cdot\text{mL}^{-1}$ ) |      |      |      |      |      |      |
|                                                 |    | 64                                            | 32   | 16   | 8    | 2    | 1    | 0    |
| PapMA-3<br>( $\mu\text{g}\cdot\text{mL}^{-1}$ ) | 32 | 2.00                                          | 1.50 | 1.25 | 1.13 | 1.03 | 1.02 | 1.00 |
|                                                 | 16 | 1.50                                          | 1.00 | 0.75 | 0.63 | 0.53 | 0.52 |      |
|                                                 | 8  | 1.25                                          | 0.75 | 0.50 | 0.38 | 0.28 | 0.27 |      |
|                                                 | 4  | 1.13                                          | 0.63 | 0.38 | 0.25 | 0.16 | 0.14 |      |
|                                                 | 2  | 1.06                                          | 0.56 | 0.31 | 0.19 | 0.10 | 0.08 |      |
|                                                 | 0  | 1.00                                          |      |      |      |      |      |      |

| FICI                                            |    | CRAB C4                                           |      |      |      |      |      |      |
|-------------------------------------------------|----|---------------------------------------------------|------|------|------|------|------|------|
|                                                 |    | Erythromycin ( $\mu\text{g}\cdot\text{mL}^{-1}$ ) |      |      |      |      |      |      |
|                                                 |    | 512                                               | 128  | 64   | 32   | 16   | 4    | 0    |
| PapMA-3<br>( $\mu\text{g}\cdot\text{mL}^{-1}$ ) | 32 | 1.50                                              | 1.13 | 1.06 | 1.03 | 1.02 | 1.01 | 1.00 |
|                                                 | 16 | 1.00                                              | 0.63 | 0.56 | 0.53 | 0.52 | 0.51 |      |
|                                                 | 8  | 0.75                                              | 0.38 | 0.31 | 0.28 | 0.27 | 0.26 |      |
|                                                 | 4  | 0.63                                              | 0.25 | 0.19 | 0.16 | 0.14 | 0.13 |      |
|                                                 | 2  | 0.56                                              | 0.19 | 0.13 | 0.10 | 0.08 | 0.07 |      |
|                                                 | 0  |                                                   |      |      |      |      |      |      |

| FICI                                            |    | CRAB C4                                        |      |      |      |      |      |      |
|-------------------------------------------------|----|------------------------------------------------|------|------|------|------|------|------|
|                                                 |    | Meropenem ( $\mu\text{g}\cdot\text{mL}^{-1}$ ) |      |      |      |      |      |      |
|                                                 |    | 128                                            | 64   | 32   | 16   | 8    | 4    | 0    |
| PapMA-3<br>( $\mu\text{g}\cdot\text{mL}^{-1}$ ) | 32 | 2.00                                           | 1.50 | 1.25 | 1.13 | 1.06 | 1.03 | 1.00 |
|                                                 | 16 | 1.50                                           | 1.00 | 0.75 | 0.63 | 0.63 | 0.53 |      |
|                                                 | 8  | 1.25                                           | 0.75 | 0.50 | 0.38 | 0.38 | 0.28 |      |
|                                                 | 4  | 1.13                                           | 0.63 | 0.38 | 0.25 |      | 0.16 |      |
|                                                 | 2  | 1.06                                           | 0.56 | 0.31 | 0.19 | 0.19 |      |      |
|                                                 | 0  | 1.00                                           |      |      |      |      |      |      |

| FICI                                            |    | CRAB C4                                         |      |      |      |      |      |      |
|-------------------------------------------------|----|-------------------------------------------------|------|------|------|------|------|------|
|                                                 |    | Vancomycin ( $\mu\text{g}\cdot\text{mL}^{-1}$ ) |      |      |      |      |      |      |
|                                                 |    | 512                                             | 256  | 128  | 64   | 32   | 16   | 0    |
| PapMA-3<br>( $\mu\text{g}\cdot\text{mL}^{-1}$ ) | 32 | 2.00                                            | 1.50 | 1.25 | 1.13 | 1.06 | 1.03 | 1.00 |
|                                                 | 16 | 1.50                                            | 1.00 | 0.75 | 0.63 | 0.56 | 0.53 |      |
|                                                 | 8  | 1.25                                            | 0.75 | 0.50 | 0.38 | 0.31 | 0.28 |      |
|                                                 | 4  | 1.13                                            | 0.63 | 0.38 | 0.25 | 0.19 | 0.16 |      |
|                                                 | 2  | 1.06                                            | 0.56 | 0.31 | 0.19 | 0.13 | 0.10 |      |
|                                                 | 0  | 1.00                                            |      |      |      |      |      |      |

| FICI                                            |    | CRAB C4                                       |      |      |      |      |      |      |
|-------------------------------------------------|----|-----------------------------------------------|------|------|------|------|------|------|
|                                                 |    | Rifampin ( $\mu\text{g}\cdot\text{mL}^{-1}$ ) |      |      |      |      |      |      |
|                                                 |    | 128                                           | 32   | 16   | 8    | 4    | 2    | 0    |
| PapMA-3<br>( $\mu\text{g}\cdot\text{mL}^{-1}$ ) | 32 | 2.00                                          | 1.25 | 1.13 | 1.06 | 1.03 | 1.02 | 1.00 |
|                                                 | 16 | 1.50                                          | 0.75 | 0.63 | 0.56 | 0.53 | 0.52 |      |
|                                                 | 8  | 1.25                                          | 0.50 | 0.38 | 0.31 | 0.28 | 0.27 |      |
|                                                 | 4  | 1.13                                          | 0.38 | 0.25 | 0.19 | 0.16 | 0.15 |      |
|                                                 | 2  | 1.06                                          | 0.31 | 0.19 | 0.13 | 0.10 | 0.08 |      |
|                                                 | 0  | 1.00                                          |      |      |      |      |      |      |

| FICI                                            |    | CRAB C4                                        |      |      |      |      |      |      |
|-------------------------------------------------|----|------------------------------------------------|------|------|------|------|------|------|
|                                                 |    | Linezolid ( $\mu\text{g}\cdot\text{mL}^{-1}$ ) |      |      |      |      |      |      |
|                                                 |    | 256                                            | 128  | 64   | 32   | 16   | 8    | 0    |
| PapMA-3<br>( $\mu\text{g}\cdot\text{mL}^{-1}$ ) | 32 | 1.50                                           | 1.25 | 1.13 | 1.06 | 1.03 | 1.02 | 1.00 |
|                                                 | 16 | 1.00                                           | 0.75 | 0.63 | 0.56 | 0.53 | 0.52 |      |
|                                                 | 8  | 0.75                                           | 0.50 | 0.38 | 0.31 | 0.28 | 0.27 |      |
|                                                 | 4  | 0.63                                           | 0.38 | 0.25 | 0.19 | 0.16 |      |      |
|                                                 | 2  | 0.56                                           | 0.31 | 0.19 |      |      | 0.08 |      |
|                                                 | 0  |                                                |      |      |      |      |      |      |

**Supplementary Figure S4.** PapMA-3 and antibiotic checkboard assay results, showing FICI calculated against CRAB C4.

| FICI                                            |    | CRAB C5                                       |      |      |      |      |      |      |
|-------------------------------------------------|----|-----------------------------------------------|------|------|------|------|------|------|
|                                                 |    | Imipenem ( $\mu\text{g}\cdot\text{mL}^{-1}$ ) |      |      |      |      |      |      |
|                                                 |    | 64                                            | 32   | 16   | 8    | 4    | 2    | 0    |
| PapMA-3<br>( $\mu\text{g}\cdot\text{mL}^{-1}$ ) | 16 | 2.00                                          | 1.50 | 1.25 | 1.13 | 1.06 | 1.03 | 1.00 |
|                                                 | 8  | 1.50                                          | 1.00 | 0.75 | 0.63 | 0.56 | 0.53 |      |
|                                                 | 4  | 1.25                                          | 0.75 | 0.50 | 0.38 | 0.31 | 0.28 |      |
|                                                 | 2  | 1.13                                          | 0.63 | 0.38 | 0.25 | 0.19 | 0.16 |      |
|                                                 | 1  | 1.06                                          | 0.56 | 0.31 | 0.19 | 0.13 | 0.10 |      |
|                                                 | 0  | 1.00                                          |      |      |      |      |      |      |

| FICI                                            |    | CRAB C5                                           |      |      |      |      |      |      |
|-------------------------------------------------|----|---------------------------------------------------|------|------|------|------|------|------|
|                                                 |    | Erythromycin ( $\mu\text{g}\cdot\text{mL}^{-1}$ ) |      |      |      |      |      |      |
|                                                 |    | 512                                               | 256  | 128  | 64   | 32   | 16   | 0    |
| PapMA-3<br>( $\mu\text{g}\cdot\text{mL}^{-1}$ ) | 16 | 1.50                                              | 1.25 | 1.13 | 1.06 | 1.03 | 1.02 | 1.00 |
|                                                 | 8  | 1.00                                              | 0.75 | 0.63 | 0.56 | 0.53 | 0.52 |      |
|                                                 | 4  | 0.75                                              | 0.50 | 0.38 | 0.31 | 0.28 | 0.27 |      |
|                                                 | 2  | 0.63                                              | 0.38 | 0.25 | 0.19 | 0.16 | 0.14 |      |
|                                                 | 1  | 0.56                                              | 0.31 | 0.19 | 0.13 | 0.10 | 0.08 |      |
|                                                 | 0  |                                                   |      |      |      |      |      |      |

| FICI                                            |    | CRAB C5                                        |      |      |      |      |      |      |
|-------------------------------------------------|----|------------------------------------------------|------|------|------|------|------|------|
|                                                 |    | Meropenem ( $\mu\text{g}\cdot\text{mL}^{-1}$ ) |      |      |      |      |      |      |
|                                                 |    | 64                                             | 32   | 16   | 8    | 4    | 2    | 0    |
| PapMA-3<br>( $\mu\text{g}\cdot\text{mL}^{-1}$ ) | 16 | 2.00                                           | 1.50 | 1.25 | 1.06 | 1.03 | 1.02 | 1.00 |
|                                                 | 8  | 1.50                                           | 1.00 | 0.75 | 0.63 | 0.56 | 0.53 |      |
|                                                 | 4  | 1.25                                           | 0.75 | 0.50 |      |      |      |      |
|                                                 | 2  | 1.13                                           | 0.63 | 0.38 |      |      |      |      |
|                                                 | 1  | 1.06                                           | 0.56 |      |      |      |      |      |
|                                                 | 0  | 1.00                                           |      |      |      |      |      |      |

| FICI                                            |    | CRAB C5                                         |      |      |      |      |      |      |
|-------------------------------------------------|----|-------------------------------------------------|------|------|------|------|------|------|
|                                                 |    | Vancomycin ( $\mu\text{g}\cdot\text{mL}^{-1}$ ) |      |      |      |      |      |      |
|                                                 |    | 256                                             | 128  | 64   | 32   | 16   | 8    | 0    |
| PapMA-3<br>( $\mu\text{g}\cdot\text{mL}^{-1}$ ) | 16 | 2.00                                            | 1.50 | 1.25 | 1.13 | 1.03 | 1.02 | 1.00 |
|                                                 | 8  | 1.50                                            | 1.00 | 0.75 | 0.63 | 0.56 | 0.53 |      |
|                                                 | 4  | 1.25                                            | 0.75 | 0.50 | 0.38 | 0.31 | 0.28 |      |
|                                                 | 2  | 1.13                                            | 0.63 | 0.38 | 0.25 | 0.19 | 0.16 |      |
|                                                 | 1  | 1.06                                            | 0.56 | 0.31 | 0.19 |      |      |      |
|                                                 | 0  | 1.00                                            |      |      |      |      |      |      |

| FICI                                            |    | CRAB C5                                       |      |      |      |      |      |      |
|-------------------------------------------------|----|-----------------------------------------------|------|------|------|------|------|------|
|                                                 |    | Rifampin ( $\mu\text{g}\cdot\text{mL}^{-1}$ ) |      |      |      |      |      |      |
|                                                 |    | 256                                           | 128  | 64   | 32   | 16   | 8    | 0    |
| PapMA-3<br>( $\mu\text{g}\cdot\text{mL}^{-1}$ ) | 16 | 2.00                                          | 1.50 | 1.25 | 1.13 | 1.03 | 1.02 | 1.00 |
|                                                 | 8  | 1.50                                          | 1.00 | 0.75 | 0.63 | 0.56 | 0.53 |      |
|                                                 | 4  | 1.25                                          | 0.75 | 0.50 | 0.38 | 0.31 | 0.28 |      |
|                                                 | 2  | 1.13                                          | 0.63 | 0.38 | 0.25 | 0.19 | 0.16 |      |
|                                                 | 1  | 1.06                                          | 0.56 | 0.31 | 0.19 | 0.13 | 0.10 |      |
|                                                 | 0  | 1.00                                          |      |      |      |      |      |      |

| FICI                                            |    | CRAB C5                                        |      |      |      |      |      |      |
|-------------------------------------------------|----|------------------------------------------------|------|------|------|------|------|------|
|                                                 |    | Linezolid ( $\mu\text{g}\cdot\text{mL}^{-1}$ ) |      |      |      |      |      |      |
|                                                 |    | 256                                            | 128  | 64   | 32   | 16   | 8    | 0    |
| PapMA-3<br>( $\mu\text{g}\cdot\text{mL}^{-1}$ ) | 16 | 1.50                                           | 1.25 | 1.13 | 1.06 | 1.03 | 1.02 | 1.00 |
|                                                 | 8  | 1.00                                           | 0.75 | 0.63 | 0.56 | 0.53 | 0.52 |      |
|                                                 | 4  | 0.75                                           | 0.50 | 0.38 | 0.31 | 0.28 | 0.27 |      |
|                                                 | 2  | 0.63                                           | 0.38 | 0.25 | 0.19 | 0.16 | 0.14 |      |
|                                                 | 1  | 0.56                                           | 0.31 | 0.19 | 0.13 | 0.10 | 0.08 |      |
|                                                 | 0  |                                                |      |      |      |      |      |      |

**Supplementary Figure S5.** PapMA-3 and antibiotic checkboard assay results, showing FICI calculated against CRAB C5.

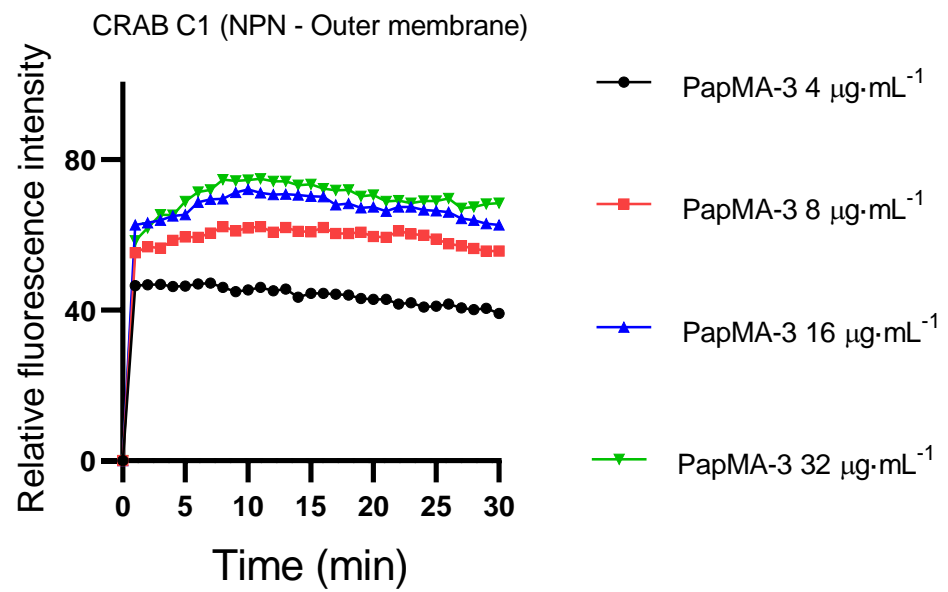

**Supplementary Figure S6.** Time-dependent outer membrane permeabilization of CRAB C1 by PapMA-3. Increase of NPN fluorescence intensity was monitored (excitation wavelength of 350 nm and an emission wavelength of 420 nm).
